# Supplementary material for: Predicting Keratoconus Progression and Need for Corneal Crosslinking Using Deep Learning
Source: MDPI journal article supplement (doi:10.3390/jcm10040844), 2021-02-18

01.jpg

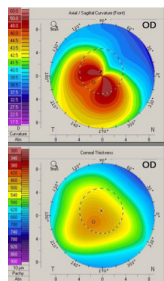

02.jpg

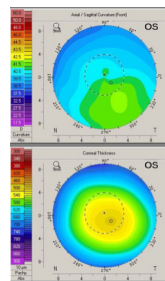

03.jpg

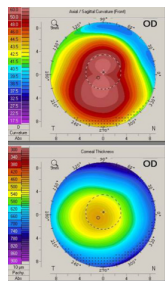

05.jpg

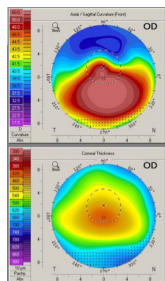

06.jpg

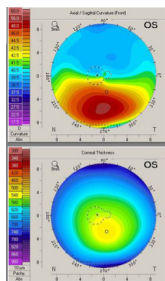

08.jpg

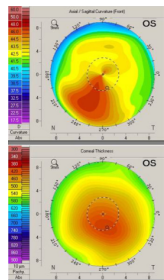

09.jpg

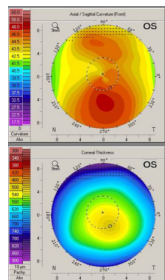

10.jpg

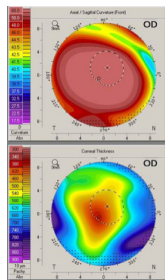

11.jpg

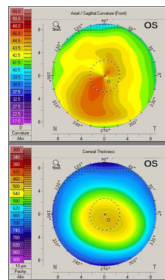

12.jpg

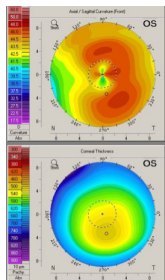

13.jpg

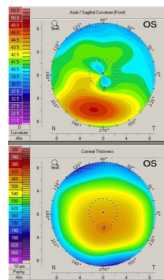

14.jpg

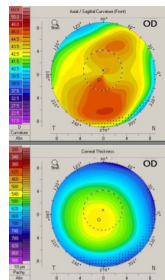

15.jpg

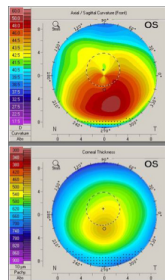

16.jpg

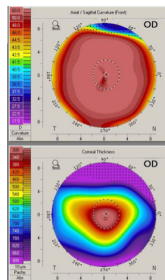

17.jpg

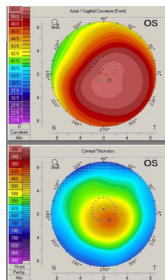

18.jpg

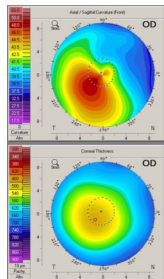

19.jpg

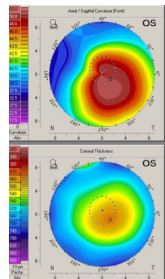

20.jpg

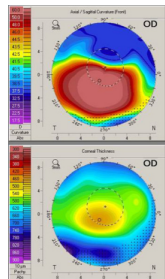

21.jpg

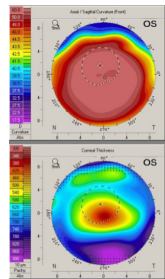

22.jpg

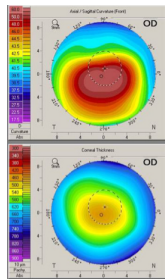

23.jpg

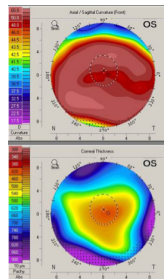

24.jpg

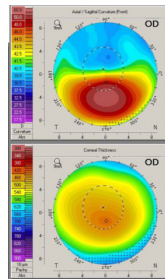

25.jpg

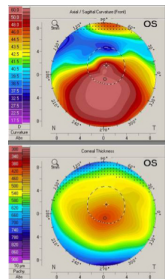

26.jpg

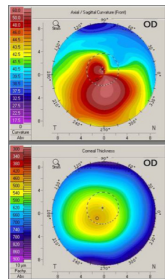

27.jpg

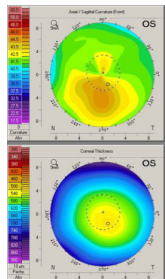

28.jpg

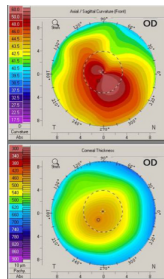

29.jpg

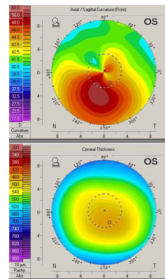

30.jpg

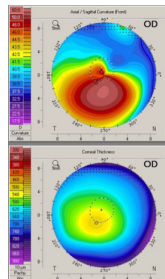

31.jpg

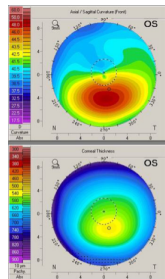

32.jpg

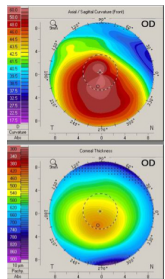

33.jpg

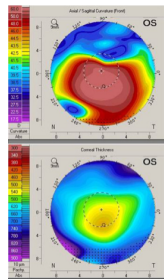

34.jpg

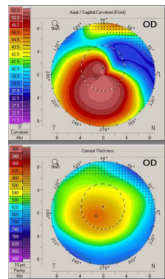

35.jpg

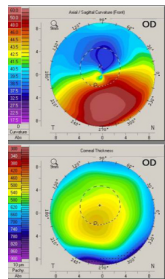

36.jpg

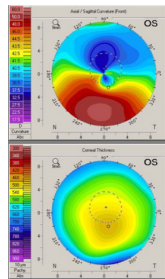

37.jpg

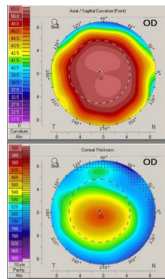



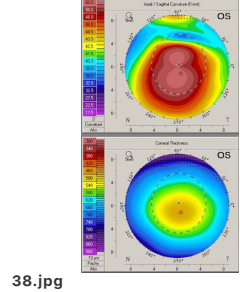

38.jpg

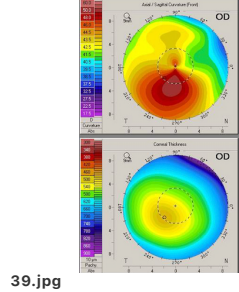

39.jpg

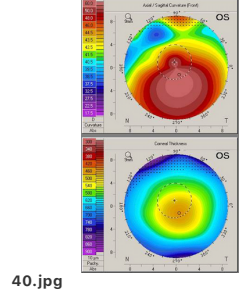

40.jpg

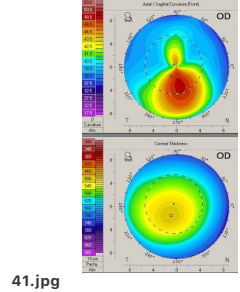

41.jpg

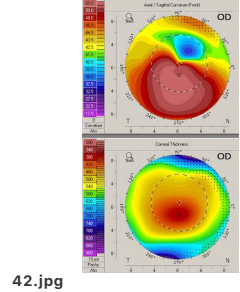

42.jpg

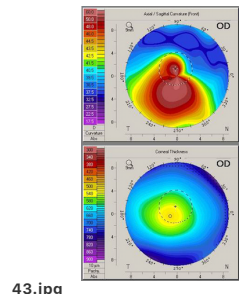

43.jpg

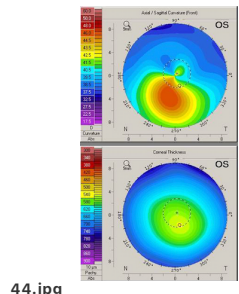

44.jpg

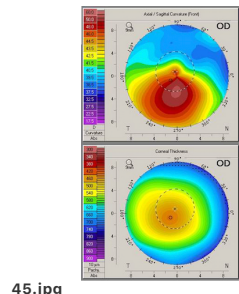

45.jpg

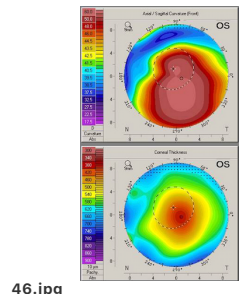

46.jpg

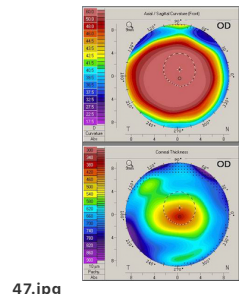

47.jpg

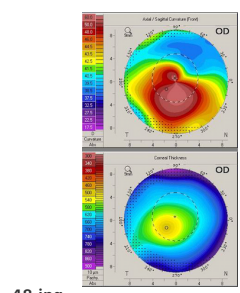

48.jpg

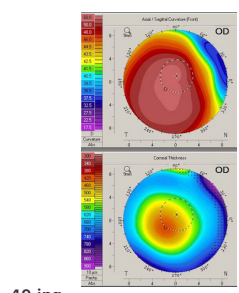

49.jpg

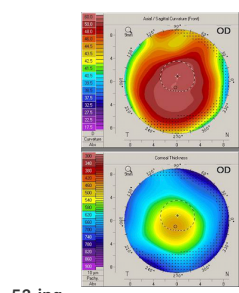

52.jpg

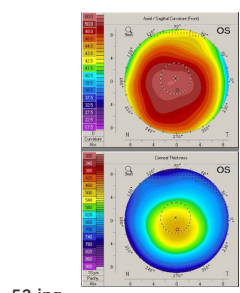

53.jpg

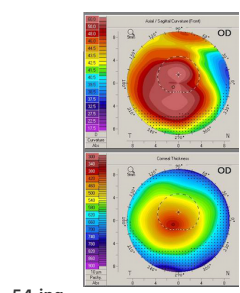

54.jpg

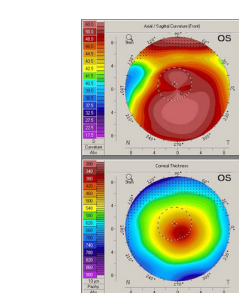

55.jpg

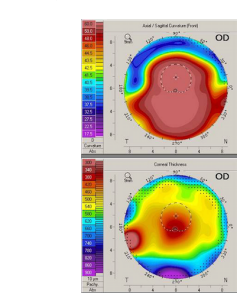

56.jpg

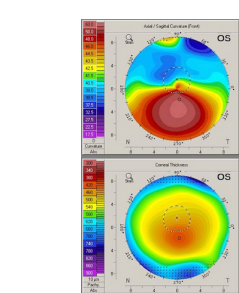

57.jpg

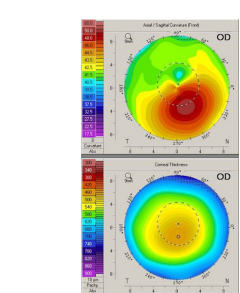

58.jpg

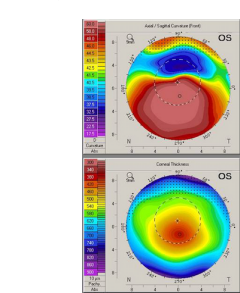

59.jpg

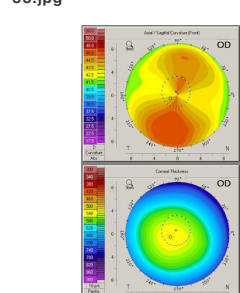

60.jpg

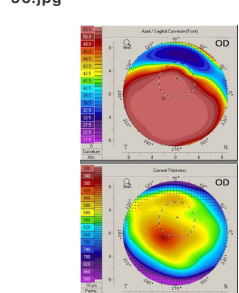

61.jpg

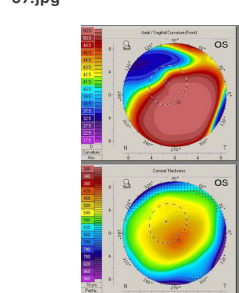

62.jpg

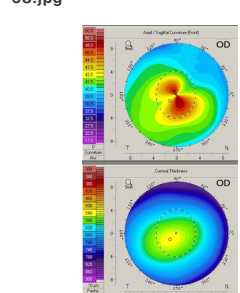

63.jpg

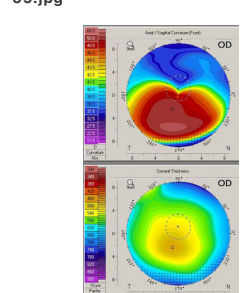

64.jpg

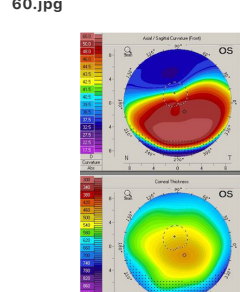

65.jpg

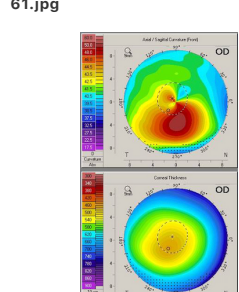

66.jpg

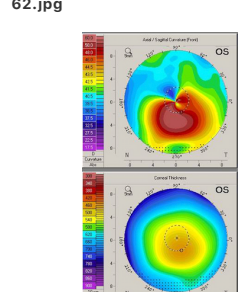

67.jpg

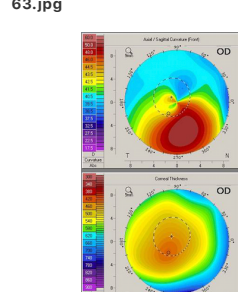

68.jpg

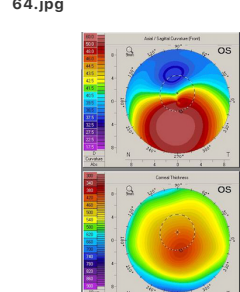

69.jpg

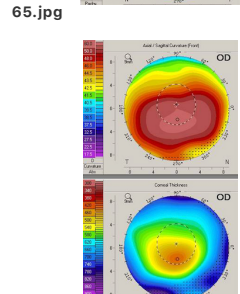

70.jpg

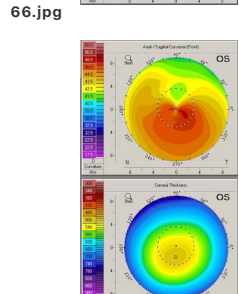

71.jpg

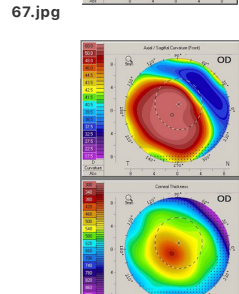

72.jpg

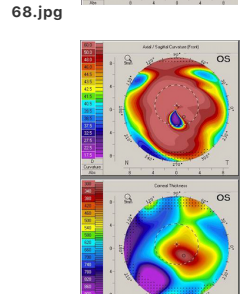

73.jpg

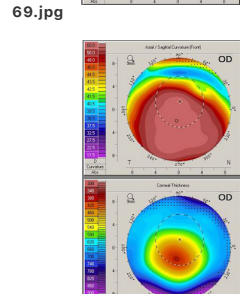

74.jpg



75.jpg

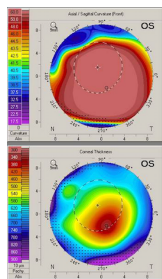

76.jpg

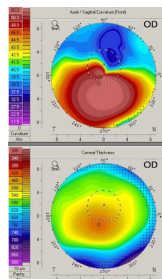

77.jpg

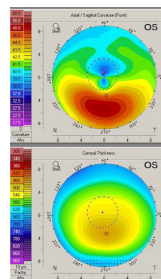

78.jpg

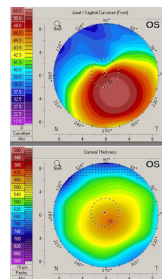

79.jpg

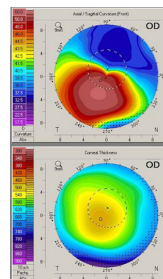

80.jpg

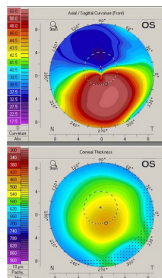

81.jpg

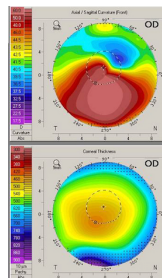

82.jpg

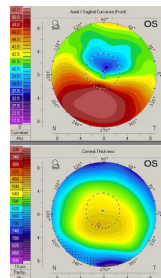

83.jpg

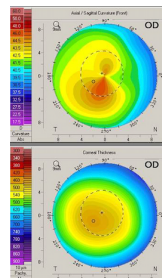

84.jpg

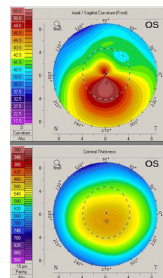

85.jpg

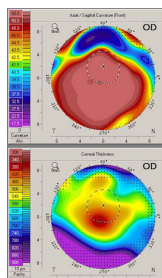

86.jpg

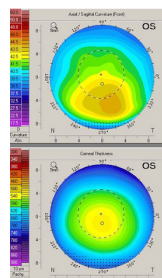

87.jpg

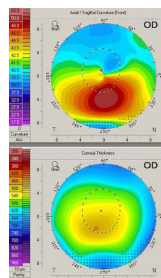

88.jpg

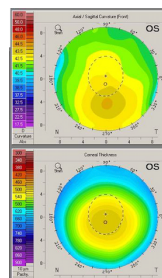

89.jpg

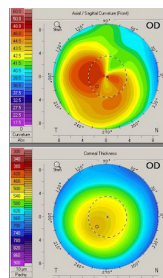

90.jpg

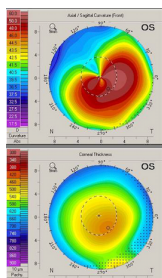

91.jpg

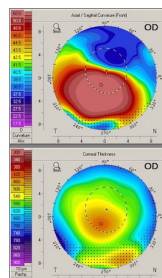

92.jpg

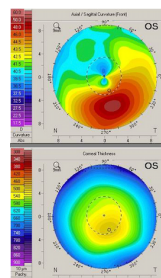

93.jpg

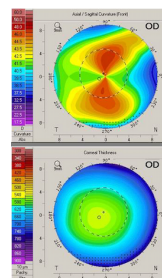

94.jpg

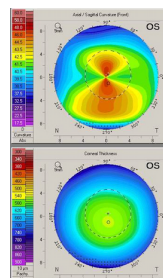

95.jpg

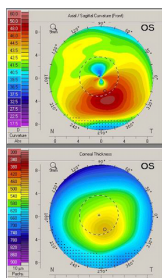

96.jpg

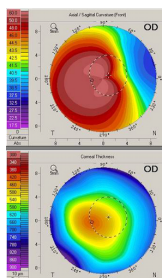

104.jpg

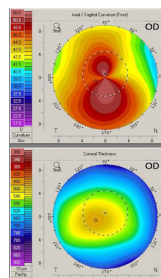

106.jpg

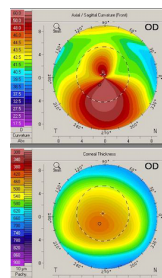

107.jpg

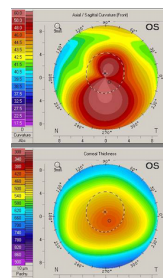

108.jpg

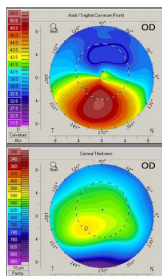

110.jpg

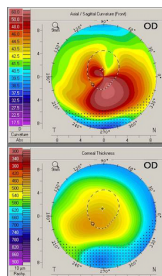

111.jpg

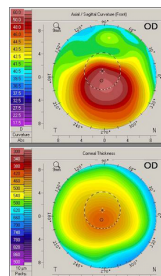

112.jpg

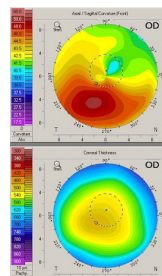

113.jpg

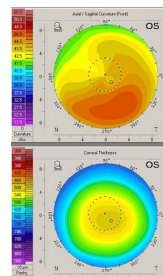

114.jpg

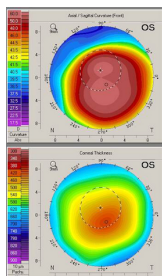

115.jpg

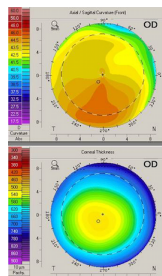

116.jpg

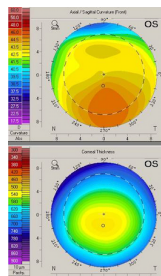

117.jpg

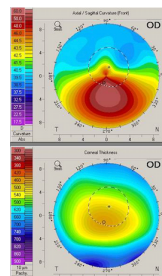

118.jpg

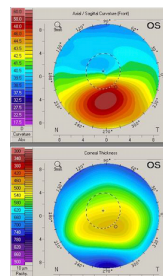



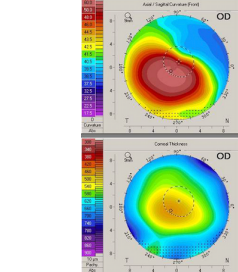

119.jpg

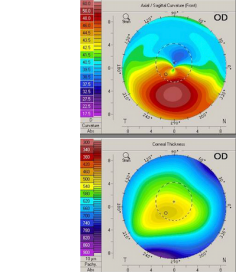

120.jpg

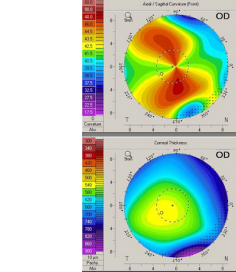

122.jpg

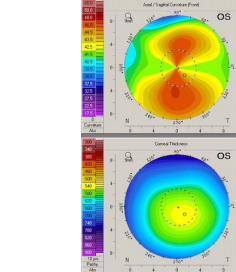

123.jpg

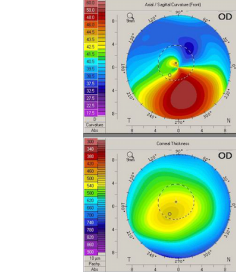

124.jpg

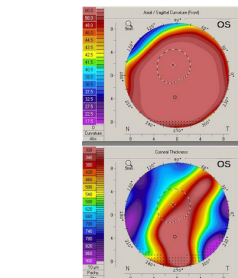

125.jpg

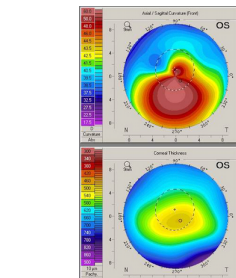

126.jpg

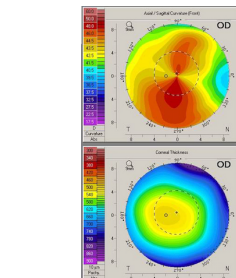

127.jpg

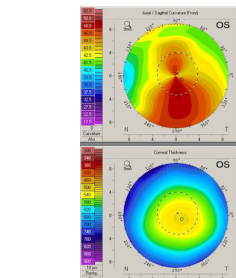

128.jpg

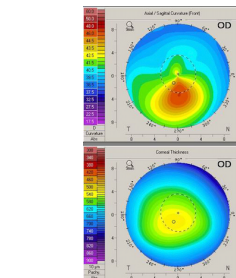

129.jpg

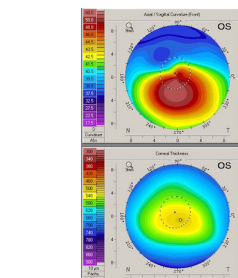

130.jpg

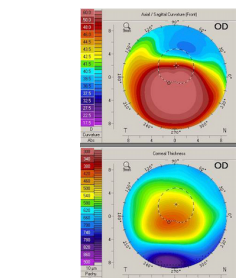

131.jpg

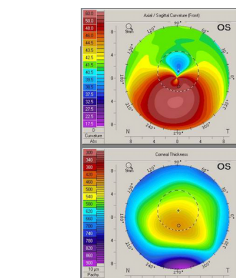

132.jpg

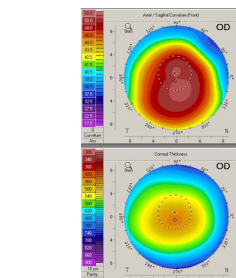

133.jpg

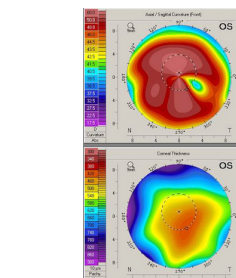

134.jpg

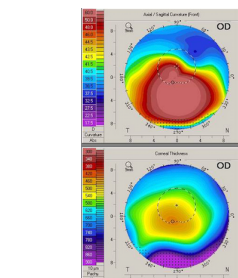

135.jpg

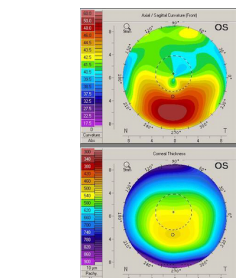

136.jpg

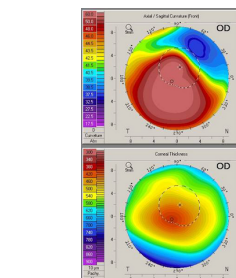

137.jpg

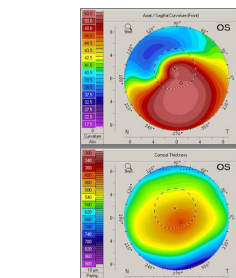

138.jpg

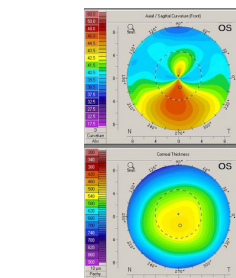

139.jpg

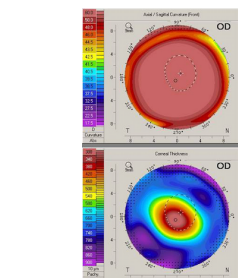

140.jpg

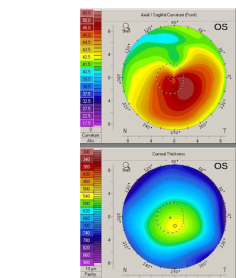

141.jpg

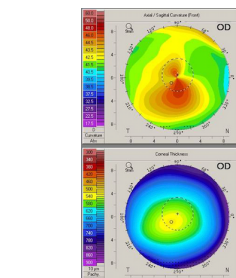

142.jpg

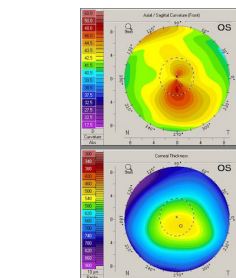

143.jpg

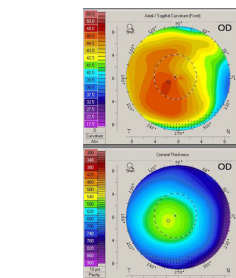

144.jpg

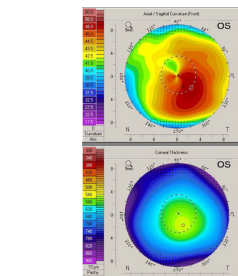

145.jpg

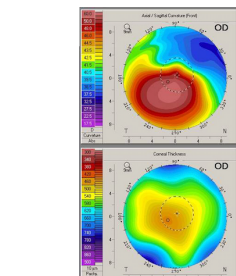

146.jpg

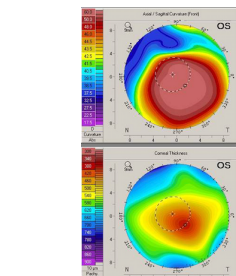

147.jpg

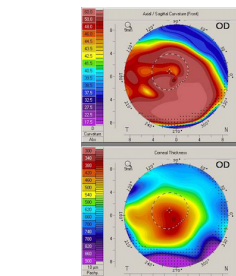

148.jpg

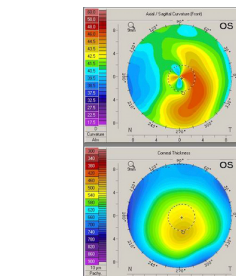

149.jpg

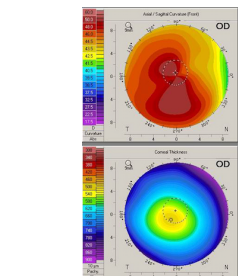

150.jpg

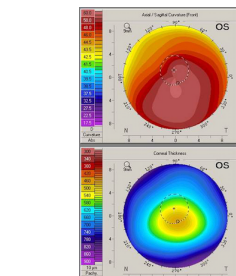

151.jpg

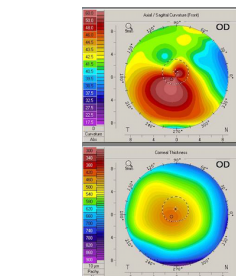

152.jpg

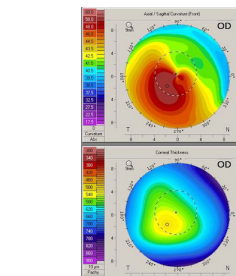

154.jpg

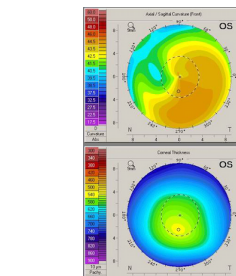

155.jpg



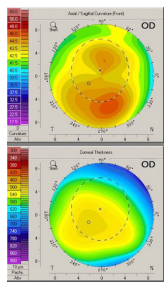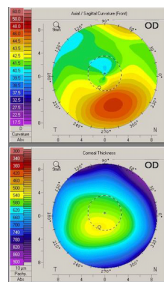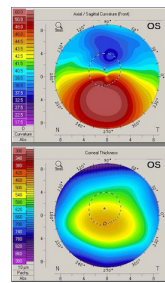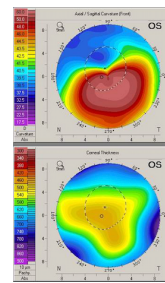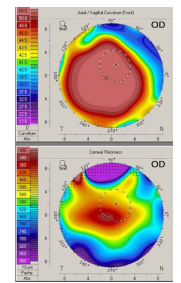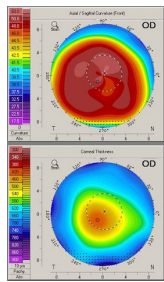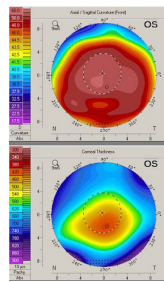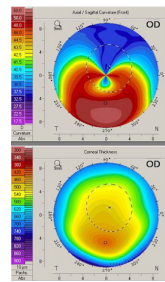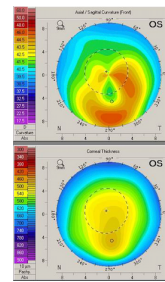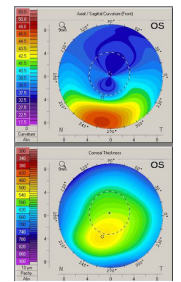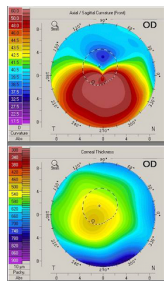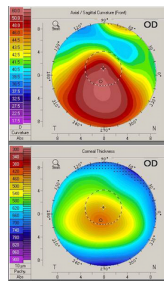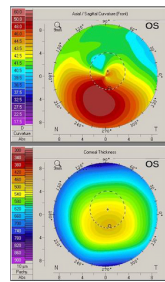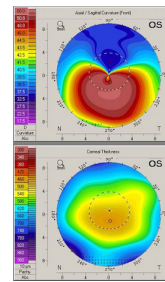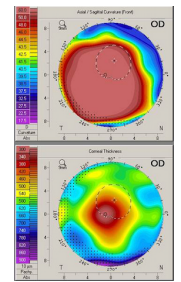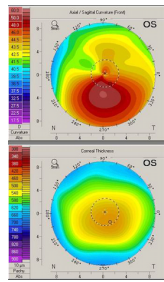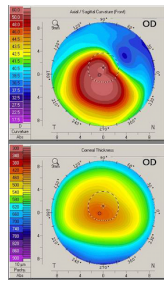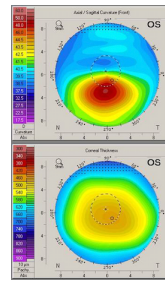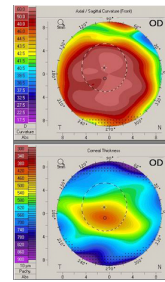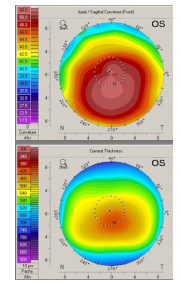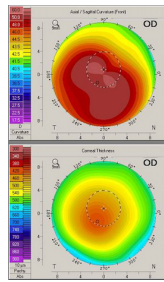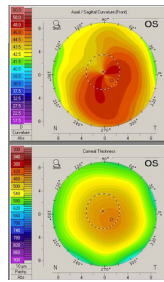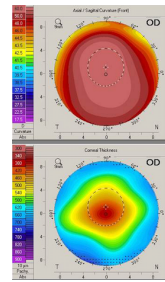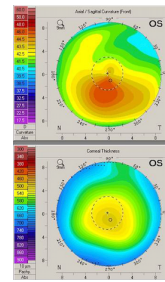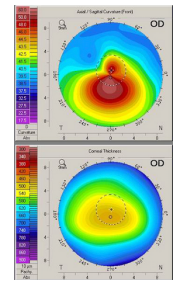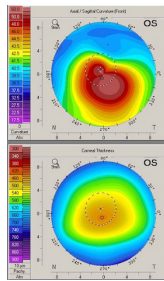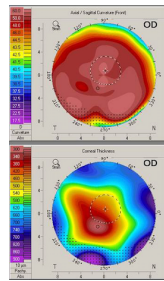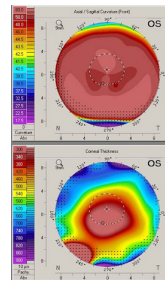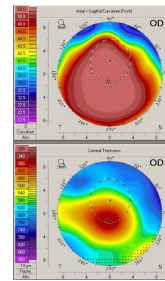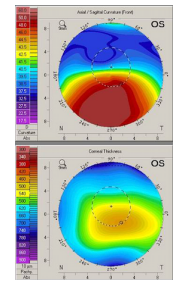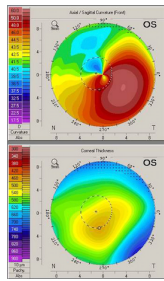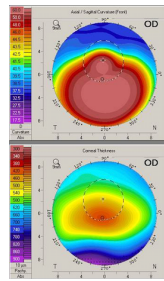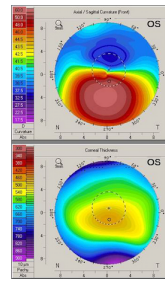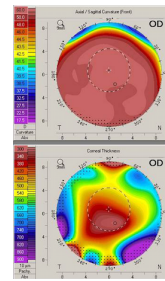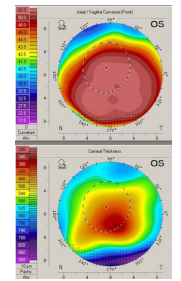



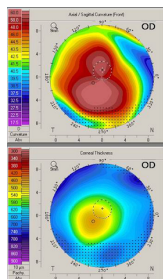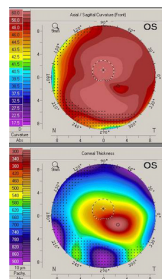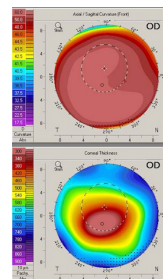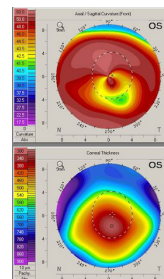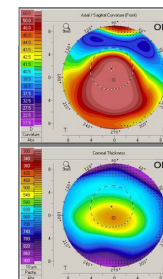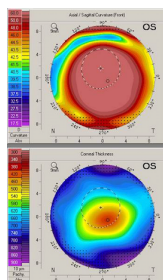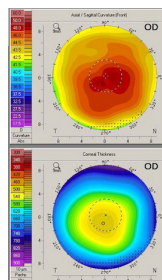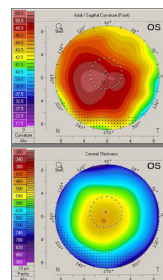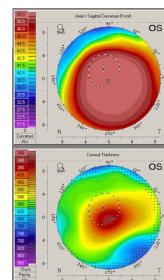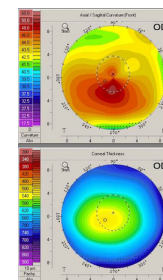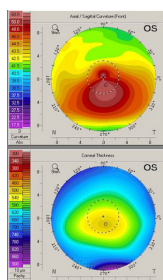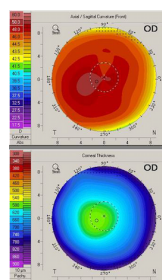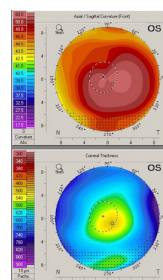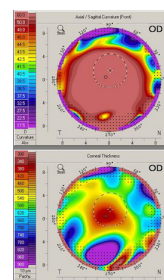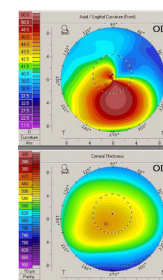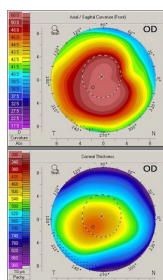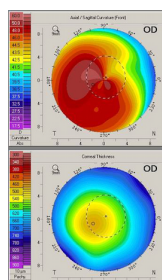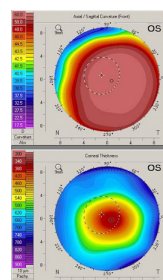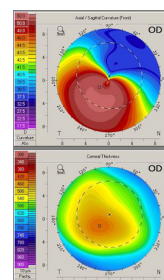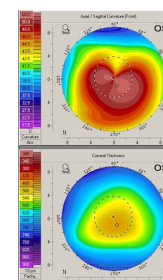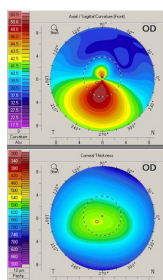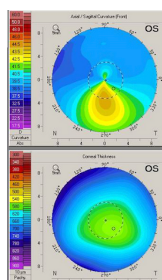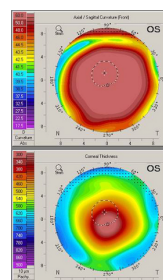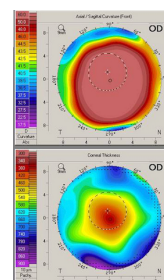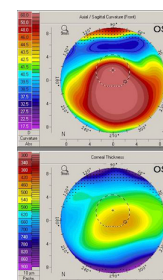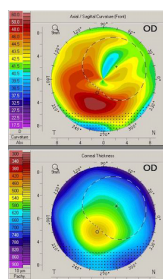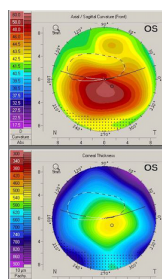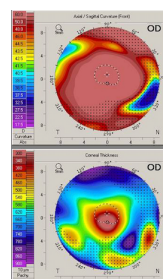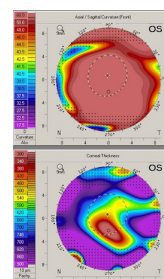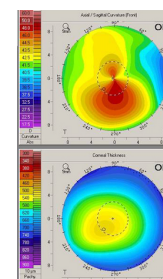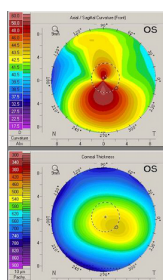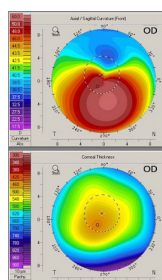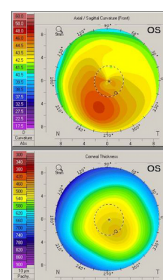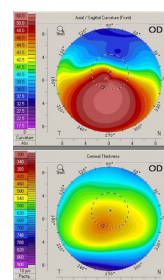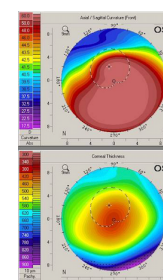



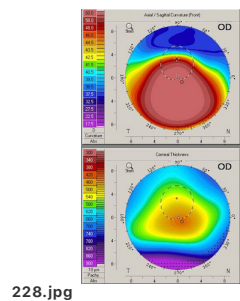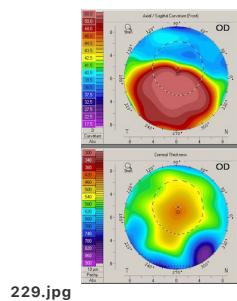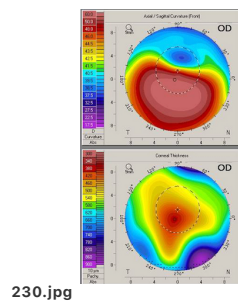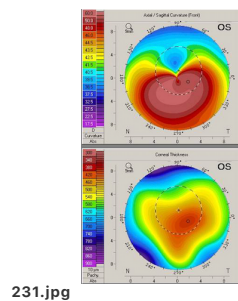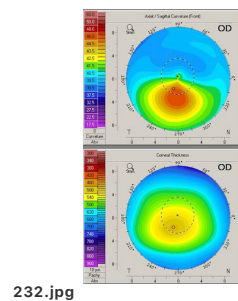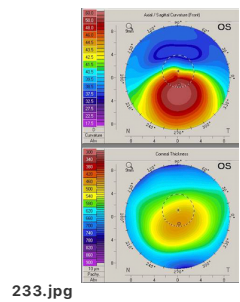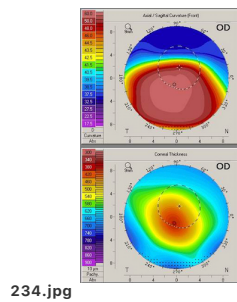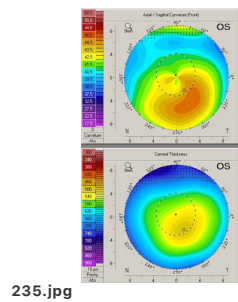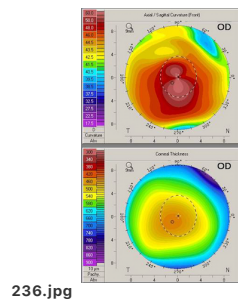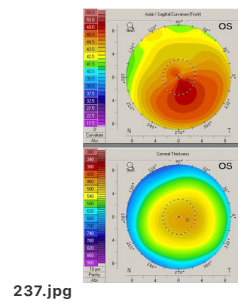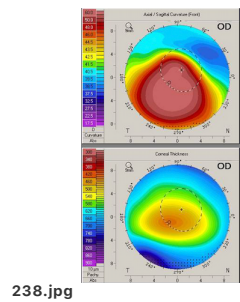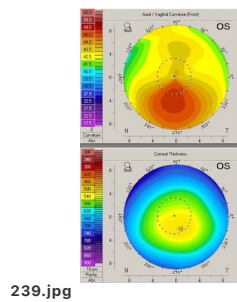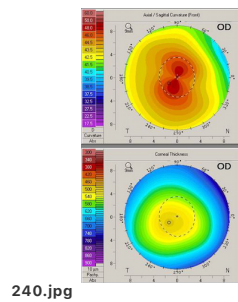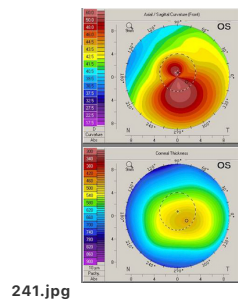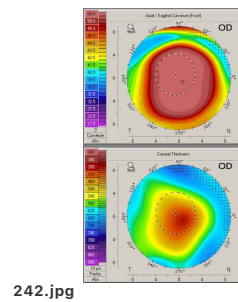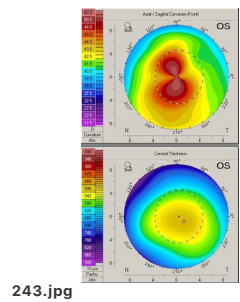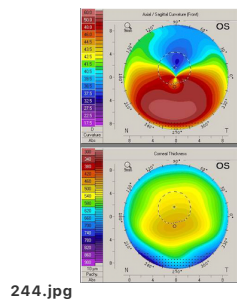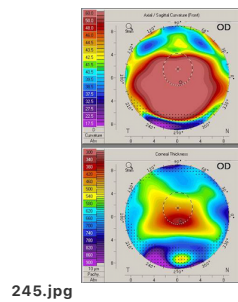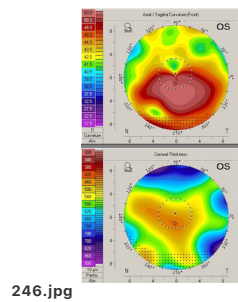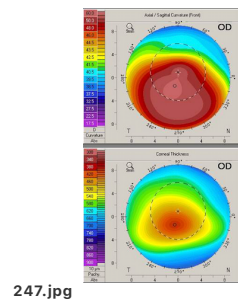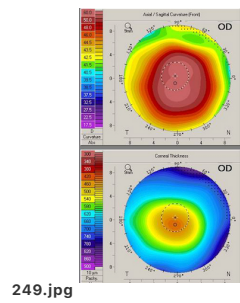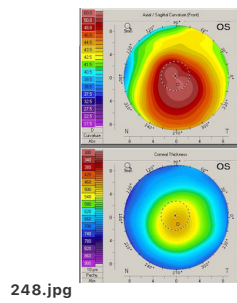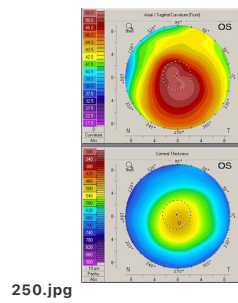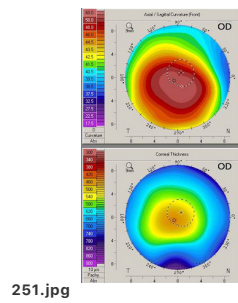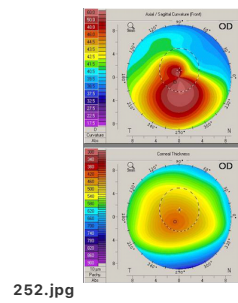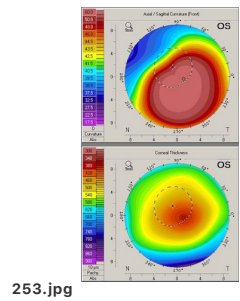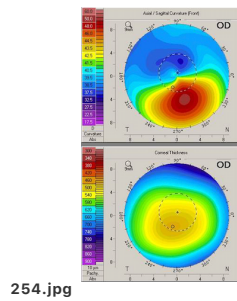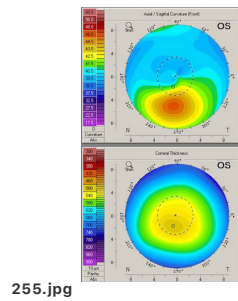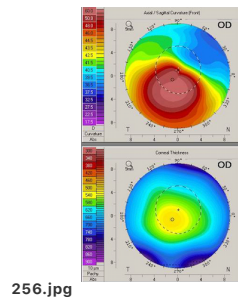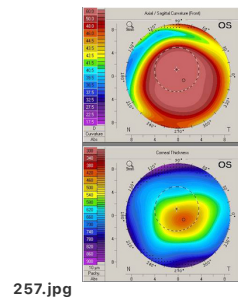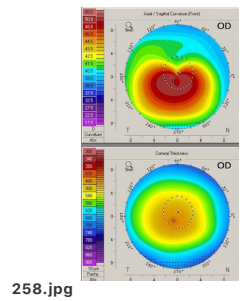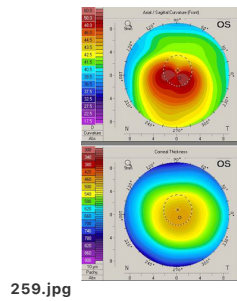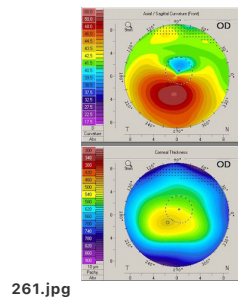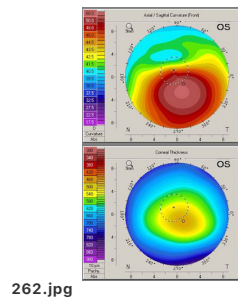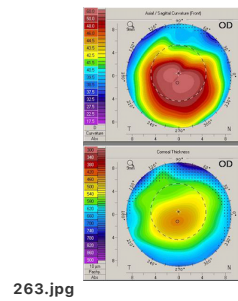



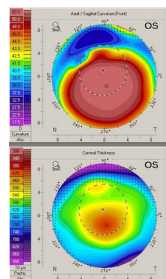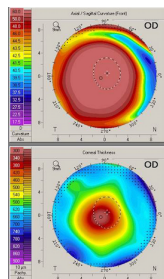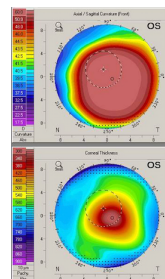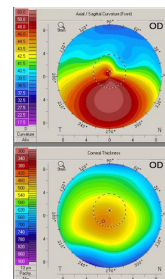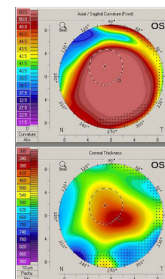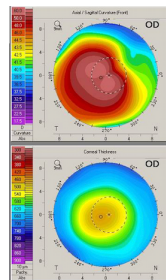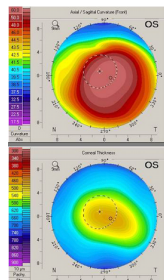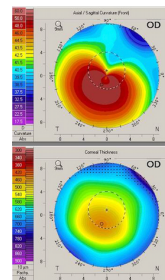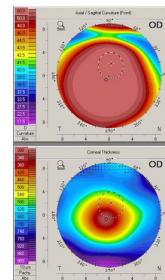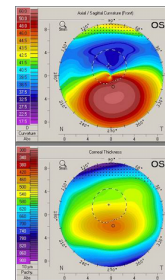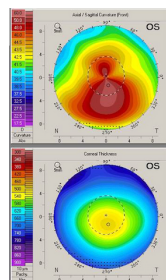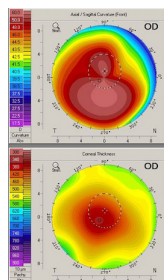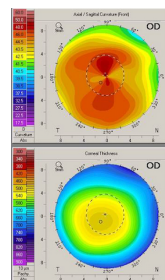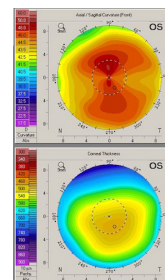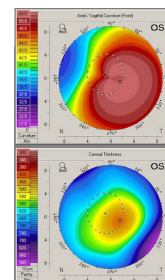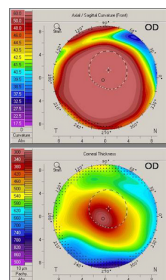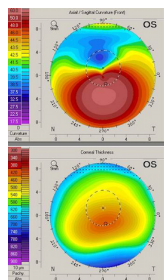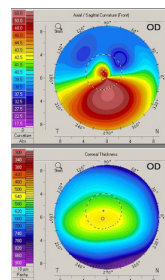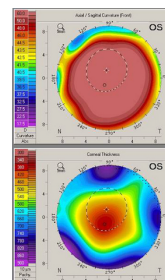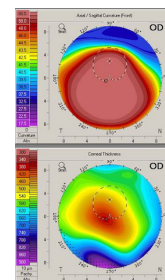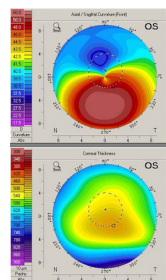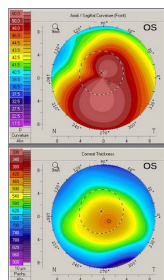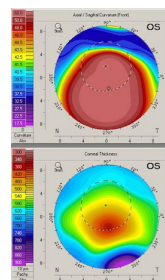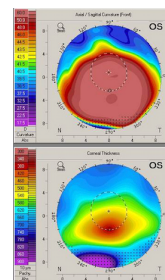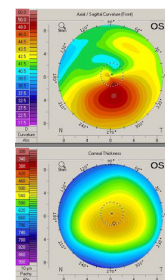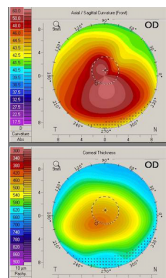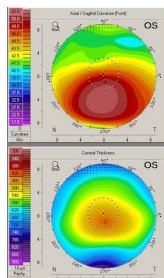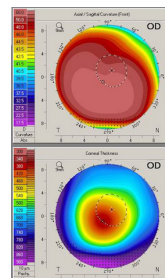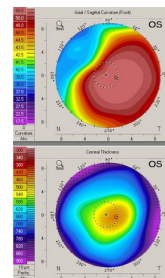

Supplement: s1 [file s1]
