# Supplementary material for: Predicting Keratoconus Progression and Need for Corneal Crosslinking Using Deep Learning
Source: MDPI journal article supplement (doi:10.3390/jcm10040844), 2021-02-18
Supplement: s1 [file s1]

| Case No. | Age   | Progression |
|----------|-------|-------------|
| 1        | 35-39 | 0           |
| 2        | 35-39 | 0           |
| 3        | 26-30 | 1           |
| 4        | 26-30 | 0           |
| 5        | 26-30 | 0           |
| 6        | 26-30 | 0           |
| 7        | 40-49 | 0           |
| 8        | 40-49 | 0           |
| 9        | 20-24 | 1           |
| 10       | 40-49 | 0           |
| 11       | 40-49 | 0           |
| 12       | 14-19 | 1           |
| 13       | 14-19 | 0           |
| 14       | 25-29 | 0           |
| 15       | 25-29 | 1           |
| 16       | 14-19 | 0           |
| 17       | 40-49 | 0           |
| 18       | 40-49 | 0           |
| 19       | 40-49 | 0           |
| 20       | 14-19 | 0           |
| 21       | 14-19 | 1           |
| 22       | 14-19 | 1           |
| 23       | 14-19 | 0           |
| 24       | 14-19 | 1           |
| 25       | 14-19 | 1           |
| 26       | 20-24 | 1           |
| 27       | 20-24 | 0           |
| 28       | 25-29 | 1           |
| 29       | 25-29 | 0           |
| 30       | 35-39 | 0           |
| 31       | 35-39 | 0           |
| 32       | 25-29 | 0           |
| 33       | 25-29 | 0           |
| 34       | 14-19 | 1           |
| 35       | 20-24 | 0           |
| 36       | 20-24 | 0           |
| 37       | 14-19 | 1           |
| 38       | 14-19 | 1           |
| 39       | 50-59 | 0           |
| 40       | 50-59 | 0           |
| 41       | 35-39 | 0           |
| 42       | 20-24 | 0           |
| 43       | 20-24 | 1           |
| 44       | 20-24 | 0           |
| 45       | 25-29 | 0           |
| 46       | 25-29 | 0           |
| 47       | 14-19 | 1           |
| 48       | 25-29 | 1           |
| 49       | 25-29 | 0           |
| 50       | 14-19 | 0           |

| Case No. | Age   | Progression |
|----------|-------|-------------|
| 51       | 14-19 | 1           |
| 52       | 40-49 | 0           |
| 53       | 40-49 | 0           |
| 54       | 20-24 | 1           |
| 55       | 20-24 | 1           |
| 56       | 20-24 | 0           |
| 57       | 20-24 | 1           |
| 58       | 20-24 | 0           |
| 59       | 20-24 | 0           |
| 60       | 25-29 | 0           |
| 61       | 30-34 | 0           |
| 62       | 30-34 | 0           |
| 63       | 20-24 | 1           |
| 64       | 25-29 | 0           |
| 65       | 25-29 | 0           |
| 66       | 20-24 | 0           |
| 67       | 20-24 | 1           |
| 68       | 35-39 | 0           |
| 69       | 35-39 | 0           |
| 70       | 14-19 | 1           |
| 71       | 14-19 | 1           |
| 72       | 14-19 | 1           |
| 73       | 14-19 | 1           |
| 74       | 25-29 | 1           |
| 75       | 25-29 | 0           |
| 76       | 14-19 | 1           |
| 77       | 14-19 | 0           |
| 78       | 35-39 | 0           |
| 79       | 35-39 | 0           |
| 80       | 35-39 | 0           |
| 81       | 14-19 | 1           |
| 82       | 14-19 | 0           |
| 83       | 20-24 | 0           |
| 84       | 20-24 | 0           |
| 85       | 14-19 | 1           |
| 86       | 14-19 | 0           |
| 87       | 30-34 | 1           |
| 88       | 30-34 | 0           |
| 89       | 25-29 | 0           |
| 90       | 25-29 | 0           |
| 91       | 25-29 | 1           |
| 92       | 25-29 | 0           |
| 93       | 9-13  | 0           |
| 94       | '9-13 | 0           |
| 95       | 14-19 | 1           |
| 96       | 35-39 | 0           |
| 97       | 35-39 | 0           |
| 98       | 40-49 | 0           |
| 99       | 40-49 | 0           |
| 100      | 20-24 | 1           |

| Case No. | Age   | Progression |
|----------|-------|-------------|
| 101      | 20-24 | 0           |
| 102      | 30-34 | 0           |
| 103      | 30-34 | 0           |
| 104      | 30-34 | 0           |
| 105      | 30-34 | 0           |
| 106      | 20-24 | 0           |
| 107      | 20-24 | 0           |
| 108      | 20-24 | 0           |
| 109      | 20-24 | 0           |
| 110      | 20-24 | 1           |
| 111      | 25-29 | 1           |
| 112      | 14-19 | 0           |
| 113      | 14-19 | 0           |
| 114      | 30-34 | 0           |
| 115      | 14-19 | 0           |
| 116      | 14-19 | 0           |
| 117      | 40-49 | 0           |
| 118      | 40-49 | 0           |
| 119      | 20-24 | 1           |
| 120      | 14-19 | 1           |
| 121      | 14-19 | 1           |
| 122      | 14-19 | 0           |
| 123      | 14-19 | 0           |
| 124      | 35-39 | 0           |
| 125      | 35-39 | 0           |
| 126      | 25-29 | 0           |
| 127      | '9-13 | 0           |
| 128      | '9-13 | 0           |
| 129      | '9-13 | 0           |
| 130      | '9-13 | 1           |
| 131      | 35-39 | 0           |
| 132      | 35-39 | 0           |
| 133      | 35-39 | 0           |
| 134      | 35-39 | 0           |
| 135      | 25-29 | 1           |
| 136      | 25-29 | 0           |
| 137      | 20-24 | 1           |
| 138      | 20-24 | 1           |
| 139      | '9-13 | 1           |
| 140      | 40-49 | 0           |
| 141      | 40-49 | 0           |
| 142      | '9-13 | 0           |
| 143      | '9-13 | 0           |
| 144      | 20-24 | 0           |
| 145      | 20-24 | 1           |
| 146      | 14-19 | 1           |
| 147      | 14-19 | 1           |
| 148      | 14-19 | 0           |
| 149      | 14-19 | 0           |
| 150      | 14-19 | 0           |

| Case No. | Age   | Progression |
|----------|-------|-------------|
| 151      | 14-19 | 1           |
| 152      | 20-24 | 1           |
| 153      | 20-24 | 0           |
| 154      | 14-19 | 1           |
| 155      | 14-19 | 1           |
| 156      | 35-39 | 0           |
| 157      | 25-29 | 0           |
| 158      | 25-29 | 1           |
| 159      | 25-29 | 1           |
| 160      | 14-19 | 1           |
| 161      | 50-59 | 0           |
| 162      | 50-59 | 0           |
| 163      | 35-39 | 0           |
| 164      | 35-39 | 0           |
| 165      | 20-24 | 0           |
| 166      | 30-34 | 1           |
| 167      | 20-24 | 1           |
| 168      | 20-24 | 0           |
| 169      | 20-24 | 1           |
| 170      | 35-39 | 0           |
| 171      | 35-39 | 0           |
| 172      | 20-24 | 1           |
| 173      | 20-24 | 1           |
| 174      | 14-19 | 1           |
| 175      | 14-19 | 1           |
| 176      | 50-59 | 0           |
| 177      | 50-59 | 0           |
| 178      | 35-39 | 0           |
| 179      | 35-39 | 0           |
| 180      | 14-19 | 0           |
| 181      | 14-19 | 1           |
| 182      | 30-34 | 0           |
| 183      | 30-34 | 0           |
| 184      | 40-49 | 0           |
| 185      | 40-49 | 0           |
| 186      | 60-69 | 0           |
| 187      | 14-19 | 1           |
| 188      | 14-19 | 1           |
| 189      | 25-29 | 1           |
| 190      | 25-29 | 0           |
| 191      | 40-49 | 1           |
| 192      | 40-49 | 0           |
| 193      | 25-29 | 0           |
| 194      | 25-29 | 0           |
| 195      | 25-29 | 0           |
| 196      | 25-29 | 0           |
| 197      | 14-19 | 0           |
| 198      | 14-19 | 1           |
| 199      | 35-39 | 0           |
| 200      | 35-39 | 0           |

| Case No. | Age   | Progression |
|----------|-------|-------------|
| 201      | 20-24 | 0           |
| 202      | 20-24 | 1           |
| 203      | 50-59 | 0           |
| 204      | 50-59 | 0           |
| 205      | 60-69 | 0           |
| 206      | 60-69 | 0           |
| 207      | 20-24 | 0           |
| 208      | 20-24 | 0           |
| 209      | 40-49 | 0           |
| 210      | 40-49 | 0           |
| 211      | '9-13 | 1           |
| 212      | 14-19 | 1           |
| 213      | 35-39 | 0           |
| 214      | 35-39 | 0           |
| 215      | 20-24 | 1           |
| 216      | 35-39 | 0           |
| 217      | 35-39 | 1           |
| 218      | 25-29 | 0           |
| 219      | 25-29 | 0           |
| 220      | 35-39 | 0           |
| 221      | 35-39 | 0           |
| 222      | 30-34 | 0           |
| 223      | 30-34 | 0           |
| 224      | 25-29 | 0           |
| 225      | 25-29 | 0           |
| 226      | 20-24 | 0           |
| 227      | 20-24 | 1           |
| 228      | 14-19 | 1           |
| 229      | 14-19 | 1           |
| 230      | 20-24 | 1           |
| 231      | 20-24 | 1           |
| 232      | 20-24 | 0           |
| 233      | 20-24 | 0           |
| 234      | 35-39 | 1           |
| 235      | 35-39 | 0           |
| 236      | '9-13 | 1           |
| 237      | '9-13 | 0           |
| 238      | 14-19 | 1           |
| 239      | 14-19 | 0           |
| 240      | '9-13 | 0           |
| 241      | '9-13 | 1           |
| 242      | 14-19 | 1           |
| 243      | 14-19 | 1           |
| 244      | 30-34 | 1           |
| 245      | 20-24 | 1           |
| 246      | 20-24 | 1           |
| 247      | 20-24 | 0           |
| 248      | 20-24 | 1           |
| 249      | 30-34 | 0           |
| 250      | 30-34 | 0           |

| Case No. | Age   | Progression |
|----------|-------|-------------|
| 251      | 20-24 | 0           |
| 252      | 30-34 | 0           |
| 253      | 30-34 | 0           |
| 254      | 14-19 | 1           |
| 255      | 14-19 | 0           |
| 256      | 20-24 | 0           |
| 257      | 20-24 | 1           |
| 258      | 20-24 | 0           |
| 259      | 20-24 | 0           |
| 260      | 50-59 | 0           |
| 261      | 20-24 | 0           |
| 262      | 20-24 | 0           |
| 263      | 40-49 | 0           |
| 264      | 40-49 | 0           |
| 265      | 40-49 | 0           |
| 266      | 40-49 | 0           |
| 267      | 40-49 | 0           |
| 268      | 40-49 | 0           |
| 269      | 40-49 | 0           |
| 270      | 50-59 | 0           |
| 271      | 50-59 | 0           |
| 272      | 30-34 | 0           |
| 273      | 35-39 | 1           |
| 274      | 35-39 | 0           |
